# Supplementary material
Source: publisher figshare collection journal article supplement (https://karger.figshare.com/ndownloader/files/8710594)
Supplement: Supplementary file 1 [file 8710594]

| Band | Frequency range (Hz) |
| --- | --- |
| 1 | 25-50 |
| 2 | 12.5-25 |
| 3 | 6.25-12.5 |
| 4 | 2.81-5.63 |
| 5 | 1.56-3.125 |
| 6 | 0.78-1.56 |
| 7 | 0.39-0.78 |
| 8 | 0.20-0.39 |
| 9 | 0.10-0.20 |
| 10 | 0.05-0.10 |
| 11 | 0-0.05 |

**Supplementary table**: frequency bands in WT analysis.
